# Supplementary material
Source: publisher figshare collection journal article supplement (https://asha.figshare.com/articles/dataset/_/12915509)
Supplement: Supplementary file 1 [file 1]

**Supplemental Material S1. Inter- and intrarater reliability.**

| <b>Outcome variables</b> | <b>Interrater Reliability</b> |
|--------------------------|-------------------------------|
| SNR Left                 | 0.88                          |
| SNR Right                | 0.92                          |
| Baseline Left            | 0.99                          |
| Baseline Right           | 0.98                          |
| Amplitude 5mL Left       | 0.99                          |
| Amplitude 5mL Right      | 0.98                          |
| Amplitude 10mL Left      | 0.99                          |
| Amplitude 10mL Right     | 0.98                          |

  

| <b>Outcome variables</b> | <b>Intrarater Reliability</b> |
|--------------------------|-------------------------------|
| SNR Left                 | 0.98                          |
| SNR Right                | 0.98                          |
| Baseline Left            | 0.99                          |
| Baseline Right           | 0.99                          |
| Amplitude 5mL Left       | 0.98                          |
| Amplitude 5mL Right      | 0.98                          |
| Amplitude 10mL Left      | 0.98                          |
| Amplitude 10mL Right     | 0.98                          |

*Note.* SNR = signal-to-noise ratio.
