# Supplementary material
Source: publisher figshare collection journal article supplement (https://asha.figshare.com/articles/dataset/_/12915509)
Supplement: Supplementary file 2 [file 1]

**Supplemental Material S3.** Normalized mean amplitude values for 5-ml and 10-ml swallow trials.

|              |           | Experimental patch |       | Conventional electrodes |       | Difference |         |
|--------------|-----------|--------------------|-------|-------------------------|-------|------------|---------|
|              |           | Left               | Right | Left                    | Right | Left       | Right   |
| <b>5 ml</b>  | <i>M</i>  | 11.57              | 12.03 | 12.15                   | 13.04 | -0.58**    | -1.0027 |
|              | <i>SD</i> | 6.73               | 7.13  | 7.01                    | 7.79  | 3.69       | 6.31    |
| <b>10 ml</b> | <i>M</i>  | 11.9               | 12.83 | 12.54                   | 13.94 | -0.63**    | -1.1**  |
|              | <i>SD</i> | 7.29               | 7.66  | 7.13                    | 8.16  | 4.54       | 6.84    |

*Note.* These values are reported in percentages, as they are normalized. \*\* $p < .05$ .
