# Supplementary material
Source: publisher figshare collection journal article supplement (https://asha.figshare.com/articles/dataset/_/12915509)
Supplement: Supplementary file 3 [file 1]

**Supplemental Material S4.** Mean duration of sEMG burst during 5-ml and 10-ml swallow trials.

|              |           | Experimental patch |       | Conventional electrodes |       | Difference |        |
|--------------|-----------|--------------------|-------|-------------------------|-------|------------|--------|
|              |           | Left               | Right | Left                    | Right | Left       | Right  |
| <b>5 ml</b>  | <i>M</i>  | 1.31               | 1.31  | 1.27                    | 1.25  | 0.04**     | 0.06** |
|              | <i>SD</i> | 0.3                | 0.3   | 0.2                     | 0.3   | 0.26       | 0.28   |
| <b>10 ml</b> | <i>M</i>  | 1.34               | 1.33  | 1.31                    | 1.32  | 0.02**     | 0.01** |
|              | <i>SD</i> | 0.3                | 0.32  | 0.3                     | 0.43  | 0.4        | 0.41   |

*Note.* These values are reported in seconds. \*\* $p < .01$ .
