# Supplementary material
Source: publisher figshare collection journal article supplement (https://asha.figshare.com/articles/dataset/_/12915509)
Supplement: Supplementary file 4 [file 1]

**Supplemental Material S2.** Mean and standard deviation of signal-to-noise ratio (SNR) and baseline amplitude results for submental muscles for both electrodes.

|                 |           | Experimental patch |       | Conventional electrodes |       | Difference |         |
|-----------------|-----------|--------------------|-------|-------------------------|-------|------------|---------|
|                 |           | Left               | Right | Left                    | Right | Left       | Right   |
| <b>SNR</b>      | <i>M</i>  | 20.64              | 20.31 | 19.44                   | 19.65 | 1.19**     | 0.65**  |
|                 | <i>SD</i> | 4.67               | 5.19  | 4.86                    | 5.43  | 3.49       | 3.91    |
| <b>Baseline</b> | <i>M</i>  | 1.33               | 1.36  | 1.66                    | 1.7   | -0.33**    | -0.34** |
|                 | <i>SD</i> | 2.0                | 2.06  | 2.07                    | 2.14  | 0.51       | 0.64    |

*Note.* \*\* $p < .05$ .
